# Supplementary material
Source: PubMed Central journal article supplement (PMC3951657)
Supplement: NIHMS562244-supplement-1.pdf [file NIHMS562244-supplement-1.pdf]

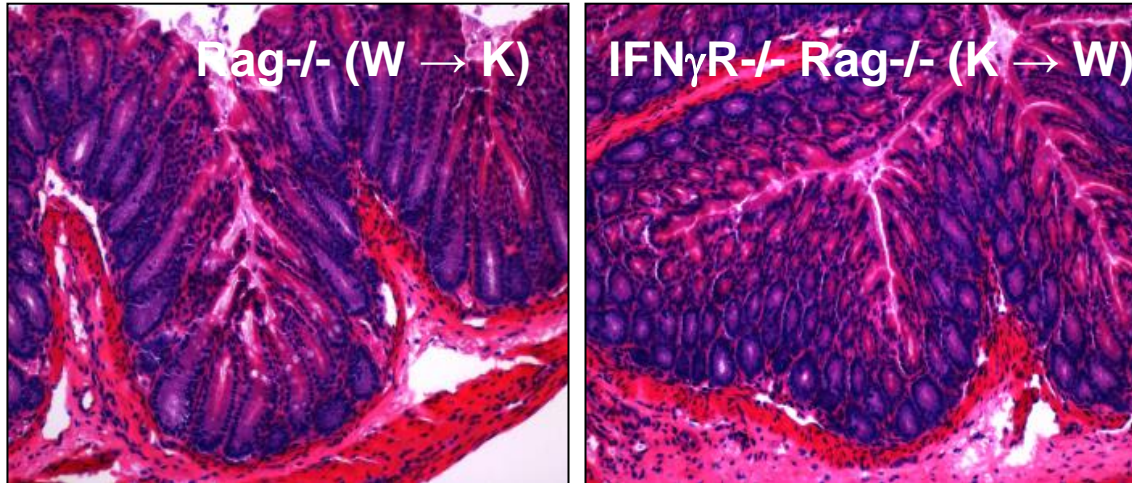

**Supplementary Figure S1. Gut inflammation in BM chimeric mice.** Naive CD4 T cells were transferred into the BM chimeric mice. The colon tissues were harvested 7 days post transfer and H&E stained. 20x magnification. (n=7)

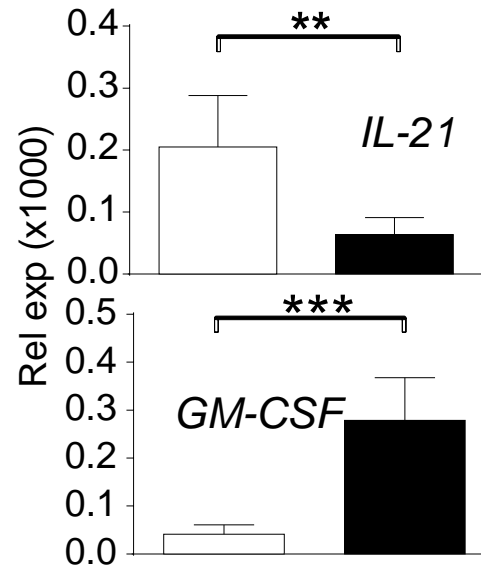

**Supplementary Fig S2. IFN $\gamma$ -dependent gene expression.**

Rag<sup>-/-</sup> (open bar) and IFN $\gamma$ R<sup>-/-</sup> Rag<sup>-/-</sup> (filled bar) mice were transferred with naïve CD4 T cells. mLN tissue was harvested 7 days post transfer, and IL-21/GM-CSF expression were measured by real time PCR.
